# Supplementary material for: Long‐term trends in critical care admissions in Wales *
Source: PubMed Central journal article supplement (PMC10138728; doi:10.1111/anae.15466), 2021-05-02

**Supplementary Figure S1.** Critical care admissions by year (bar) and per 10,000 population (line).

Rate ratios are presented per 10,000 population relative to 2008

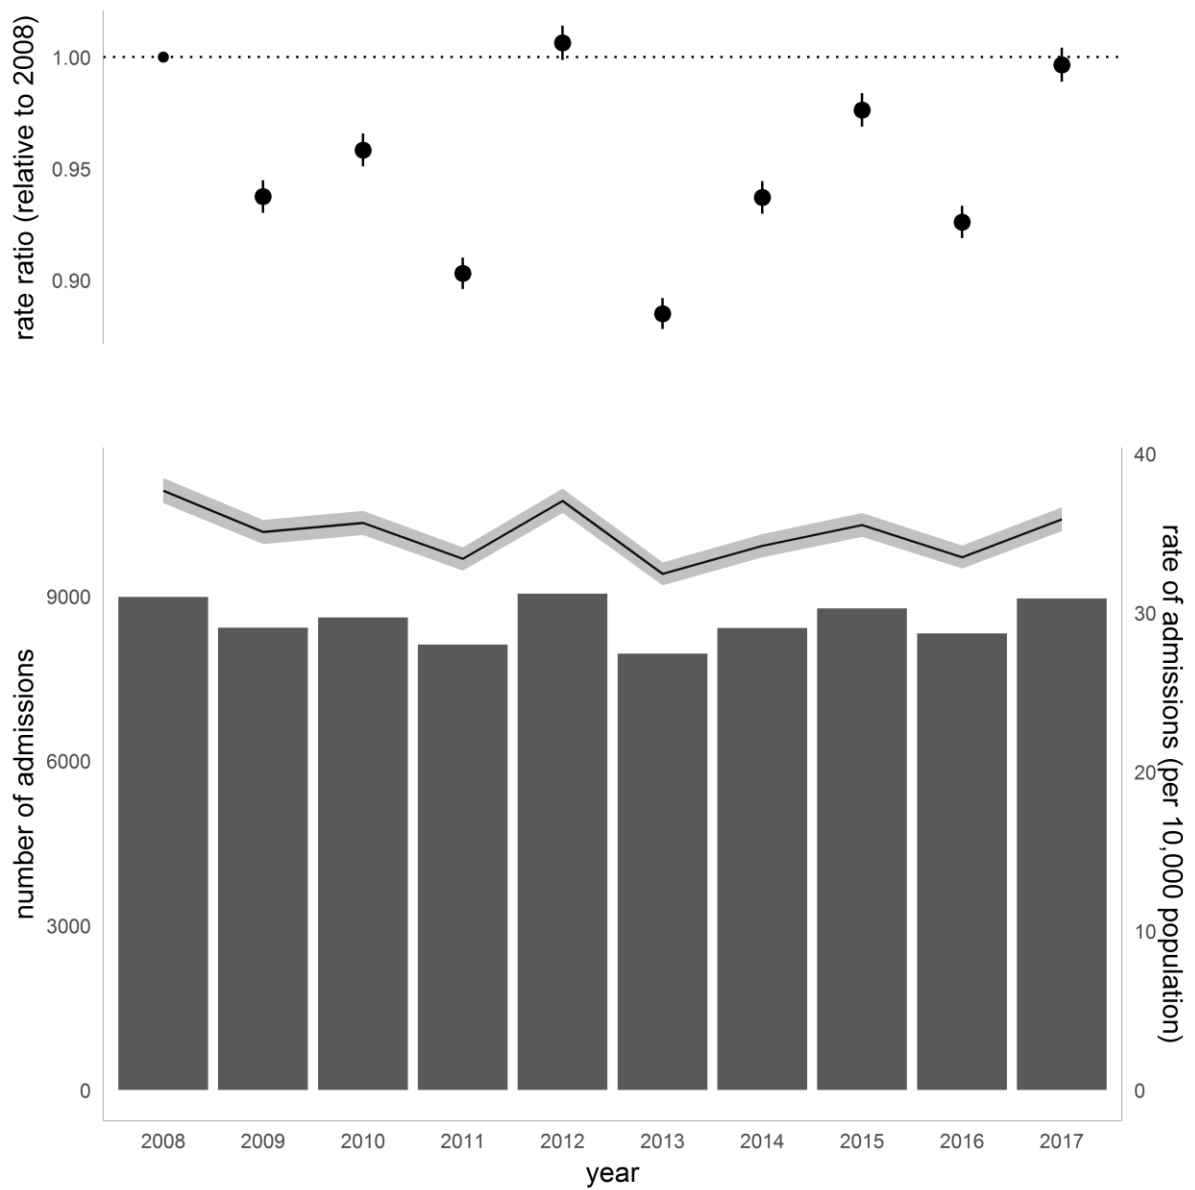

Supplement: ANAE-76-1316-s001.pdf [file ANAE-76-1316-s001.pdf]
